# Supplementary material for: You Had Me at “MAGIC”!: Four Barley MAGIC Populations Reveal Novel Resistance QTL for Powdery Mildew
Source: MDPI journal article supplement (doi:10.3390/genes11121512), 2020-12-18
Supplement: s1 [file s1]

## Table S1

You had me at “MAGIC”! Four barley MAGIC populations reveal novel resistance QTL for Powdery Mildew

Fluturë Novakazi <sup>1</sup>, Lene Krusell <sup>2</sup>, Jens Due Jensen <sup>3</sup>, Jihad Orabi <sup>3</sup>, The PPP Barley Consortium, Ahmed Jahoor <sup>3</sup>, Therése Bengtsson <sup>1\*</sup>

<sup>1</sup> Department of Plant Breeding, Swedish University of Agricultural Sciences, Box 101, 230 53, Alnarp Sweden

<sup>2</sup> Sejet Plant Breeding, Nørremarksvej 67, 8700 Horsens, Denmark

<sup>3</sup> Nordic Seed A/S, Kornmarken 1, 8464 Galten Denmark

\*Correspondence: Therése Bengtsson: [therese.bengtsson@slu.se](mailto:therese.bengtsson@slu.se)

## Contents

**Descriptive statistics** for all observations and panels

**Correlation plots** for all observations and panels

### **The PPP Barley Consortium**

Inger Åhman (Department of Plant Breeding, Swedish University of Agricultural Sciences, Box 101, 230 53 Alnarp, Sweden),

Therése Bengtsson (Department of Plant Breeding, Swedish University of Agricultural Sciences, Box 101, 230 53 Alnarp, Sweden),

Fluturë Novakazi (Department of Plant Breeding, Swedish University of Agricultural Sciences, Box 101, 230 53 Alnarp, Sweden),

Outi Manninen (Boreal Plant Breeding Ltd, Myllytie 10, 31600 Jokioinen, Finland),

Merja Veteläinen (Boreal Plant Breeding Ltd, Myllytie 10, 31600 Jokioinen, Finland),

Mika Isolahti (Boreal Plant Breeding Ltd, Myllytie 10, 31600 Jokioinen, Finland),

Muath Alsheikh (Graminor A/S, Hommelstadvegen 60, 2322 Ridabu, Norway),

Stein Bergersen (Graminor A/S, Hommelstadvegen 60, 2322 Ridabu, Norway),

Constantin Jansen (Graminor A/S, Hommelstadvegen 60, 2322 Ridabu, Norway),

Susanne Windju (Graminor A/S, Hommelstadvegen 60, 2322 Ridabu, Norway),

Marja Jalli, (Natural Resources Institute Finland (Luke), Tietotie 4, 31600 Jokioinen, Finland),

Juho Hautsalo, (Natural Resources Institute Finland (Luke), Survontie 9, 40500 Jyväskylä, Finland),

Ahmed Jahoor (NordicSeed A/S, Kornmarken 1, 8464 Galten, Denmark) (project leader),

Jens Due Jensen (Nordic Seed A/S, Kornmarken 1, 8464 Galten, Denmark),

Jihad Orabi (Nordic Seed A/S, Kornmarken 1, 8464 Galten, Denmark),

Nana Vagndorf Nordestgaard (Nordic Seed A/S, Kornmarken 1, 8464 Galten, Denmark),

Lene Krusell (Sejet Plant Breeding, Nørremarksvej 67, 8700 Horsens, Denmark),

Rasmus Lund Hjortshøj (Sejet Plant Breeding, Nørremarksvej 67, 8700 Horsens, Denmark),

Charlotte Damgård Robertsen, (Sejet Plant Breeding, Nørremarksvej 67, 8700 Horsens, Denmark),

Magnus Göransson (The Agricultural University of Iceland, Faculty of Land and Animal Resources, Hvanneyri, 311 Borgarnes, Iceland)

Descriptive statistics for all observations and panels, computed with the psych software package v, 1.8.12 (Revelle, 2018) using the R software (R Development Core Team, 2017), Table shows number of observations (n), mean, standard deviation (sd), median, minimum (min), maximum (max), range, skew, kurtosis, and standard error (se).

### **MAGIC 1+2**

| <b>Observation</b> | <b>n</b> | <b>mean</b> | <b>sd</b> | <b>median</b> | <b>min</b> | <b>max</b> | <b>range</b> | <b>skew</b> | <b>kurtosis</b> | <b>se</b> |
|--------------------|----------|-------------|-----------|---------------|------------|------------|--------------|-------------|-----------------|-----------|
| Dyngby_17_1        | 134      | 3.09        | 2.09      | 3             | 1          | 8          | 7            | 0.52        | -1.05           | 0.18      |
| Dyngby_17_2        | 134      | 2.72        | 1.77      | 2             | 1          | 7          | 6            | 0.54        | -1.04           | 0.15      |
| Dyngby_18_1        | 134      | 3.19        | 1.77      | 3             | 1          | 7          | 6            | 0.31        | -1.18           | 0.15      |
| Horsens_18_1       | 134      | 2.62        | 1.65      | 2             | 1          | 6          | 5            | 0.48        | -1.22           | 0.14      |
| Horsens_18_2       | 134      | 3.93        | 2.63      | 4             | 1          | 9          | 8            | 0.35        | -1.24           | 0.23      |
| All                | 134      | 3.11        | 1.74      | 3             | 1          | 7          | 6            | 0.04        | -0.87           | 0.16      |

**MAGIC 3**

| Observation  | n  | mean | sd   | median | min | max | range | skew  | kurtosis | se   |
|--------------|----|------|------|--------|-----|-----|-------|-------|----------|------|
| Dyngby_17_1  | 83 | 4.04 | 1.74 | 4      | 1   | 7   | 6     | -0.22 | -1.03    | 0.19 |
| Dyngby_17_2  | 83 | 3.48 | 1.71 | 3      | 1   | 7   | 6     | 0.22  | -0.95    | 0.19 |
| Dyngby_18_1  | 83 | 4.14 | 1.46 | 4      | 1   | 7   | 6     | 0.08  | -0.76    | 0.16 |
| Horsens_18_1 | 83 | 3.04 | 1.31 | 3      | 1   | 6   | 5     | 0.29  | -0.84    | 0.14 |
| Horsens_18_2 | 83 | 5.47 | 1.71 | 6      | 2   | 9   | 7     | 0.01  | -0.65    | 0.19 |
| All          | 83 | 4.03 | 1.41 | 4      | 1   | 7   | 6     | 0.04  | -0.87    | 0.16 |

**MAGIC 4**

| Observation  | n   | mean | sd   | median | min | max | range | skew  | kurtosis | se   |
|--------------|-----|------|------|--------|-----|-----|-------|-------|----------|------|
| Dyngby_17_1  | 279 | 4.48 | 1.58 | 5      | 1   | 7   | 6     | -0.74 | -0.27    | 0.09 |
| Dyngby_17_2  | 279 | 3.28 | 1.28 | 3      | 1   | 6   | 5     | -0.24 | -0.65    | 0.08 |
| Dyngby_18_1  | 279 | 4.14 | 1.18 | 4      | 1   | 7   | 6     | -0.36 | -0.12    | 0.07 |
| Horsens_18_1 | 279 | 4.14 | 1.20 | 4      | 1   | 7   | 6     | -0.52 | -0.20    | 0.07 |
| Horsens_18_2 | 279 | 4.17 | 1.42 | 4      | 1   | 8   | 7     | 0.03  | -0.51    | 0.09 |
| All          | 279 | 4.04 | 1.12 | 4      | 1   | 7   | 6     | -0.39 | -0.10    | 0.07 |

**MAGIC 1 to 4**

| Observation  | n   | mean | sd   | median | min | max | range | skew  | kurtosis | se   |
|--------------|-----|------|------|--------|-----|-----|-------|-------|----------|------|
| Dyngby_17_1  | 490 | 4.04 | 1.85 | 4      | 1   | 8   | 7     | -0.35 | -1.02    | 0.08 |
| Dyngby_17_2  | 490 | 3.17 | 1.52 | 3      | 1   | 7   | 6     | 0.10  | -0.81    | 0.07 |
| Dyngby_18_1  | 490 | 3.90 | 1.46 | 4      | 1   | 7   | 6     | -0.25 | -0.59    | 0.07 |
| Horsens_18_1 | 490 | 3.56 | 1.51 | 4      | 1   | 7   | 6     | -0.28 | -1.00    | 0.07 |
| Horsens_18_2 | 490 | 4.33 | 1.94 | 4      | 1   | 9   | 8     | 0.13  | -0.51    | 0.09 |
| All          | 490 | 3.80 | 1.41 | 4      | 1   | 7   | 6     | -0.27 | -0.61    | 0.06 |

Analysis of variance (ANOVA model III, with Satterthwaite's method) of powdery mildew using lmer function in R, Genotypes, environments, and genotype by environment interactions were considered, as fixed effects, and the observations nested within the environments, as random effect

| <b>MAGIC 1+2</b> | Sum of Squares | Mean Squares | Degree of Freedom | F-value | Pr(>F)  |
|------------------|----------------|--------------|-------------------|---------|---------|
| GEN              | 1816           | 13.66        | 133               | 7.25    | <0.0001 |
| ENV              | 0.59           | 0.29         | 2                 | 0.16    | 0.8647  |
| GEN*ENV          | 190            | 0.71         | 266               | 0.38    | 1       |

Residual estimate = 1.8831, and Residual standard error = 1.3723

| <b>MAGIC 3</b> | Sum of Squares | Mean Squares | Degree of Freedom | F-value | Pr(>F)  |
|----------------|----------------|--------------|-------------------|---------|---------|
| GEN            | 741            | 9.04         | 82                | 9.9231  | <0.0001 |
| ENV            | 0.15           | 0.076        | 2                 | 0.0832  | 0.9232  |
| GEN*ENV        | 74.07          | 0.45         | 164               | 0.4956  | 1       |

Residual estimate = 0.9113, and Residual standard error = 0.9546

| <b>MAGIC 4</b> | Sum of Squares | Mean Squares | Degree of Freedom | F-value | Pr(>F)  |
|----------------|----------------|--------------|-------------------|---------|---------|
| GEN            | 1579           | 5.68         | 278               | 6.8812  | <0.0001 |
| ENV            | 0.20           | 0.10         | 2                 | 0.1205  | 0.8925  |
| GEN*ENV        | 312            | 0.56         | 556               | 0.680   | 1       |

Residual estimate = 0.8253, and Residual standard error = 0.9085

| <b>MAGIC 1 to 4</b> | Sum of Squares | Mean Squares | Degree of Freedom | F-value | Pr(>F)  |
|---------------------|----------------|--------------|-------------------|---------|---------|
| GEN                 | 4429           | 9.06         | 489               | 6.544   | <0.0001 |
| ENV                 | 0.50           | 0.25         | 2                 | 0.1820  | 0.8460  |
| GEN*ENV             | 575            | 0.59         | 978               | 0.425   | 1       |

Residual estimate=1.3841, and Residual standard error= 1.1765
